# Supplementary material for: 3063 鉄筋補強鋼管コンクリート柱の中心圧縮載荷加熱試験(各種構造の耐火性 (2), 防火)
Source: Royal Society of Chemistry journal article supplement (doi:10.1039/c8cp02054j), 2006-07-31
Supplement: c8cp02054j1.pdf [file c8cp02054j1.pdf]

PCCP

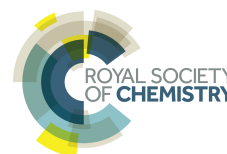

## Supporting Information

### **Tuning the size of gold nanoparticles produced by multiple filamentation of femtosecond laser pulses in aqueous solution.**

Hakim Belmouaddine,<sup>\*a</sup> Minghan Shi,<sup>a</sup> Léon Sanche<sup>a</sup> and Daniel Houde<sup>\*a</sup>

<sup>a</sup> Department of Nuclear Medicine and Radiobiology, Faculty of Medicine and Health Sciences, University of Sherbrooke, Sherbrooke, QC, J1H 5N4 (Canada).  
Fax: +1 819 564 5442; Tel: +1 819 346 1110 ext. 74345.

\* Authors to whom correspondence should be addressed. E-mail: hakim.belmouaddine@usherbrooke.ca

## Representative Transmission Electron Microscopy images of gold nanoparticles

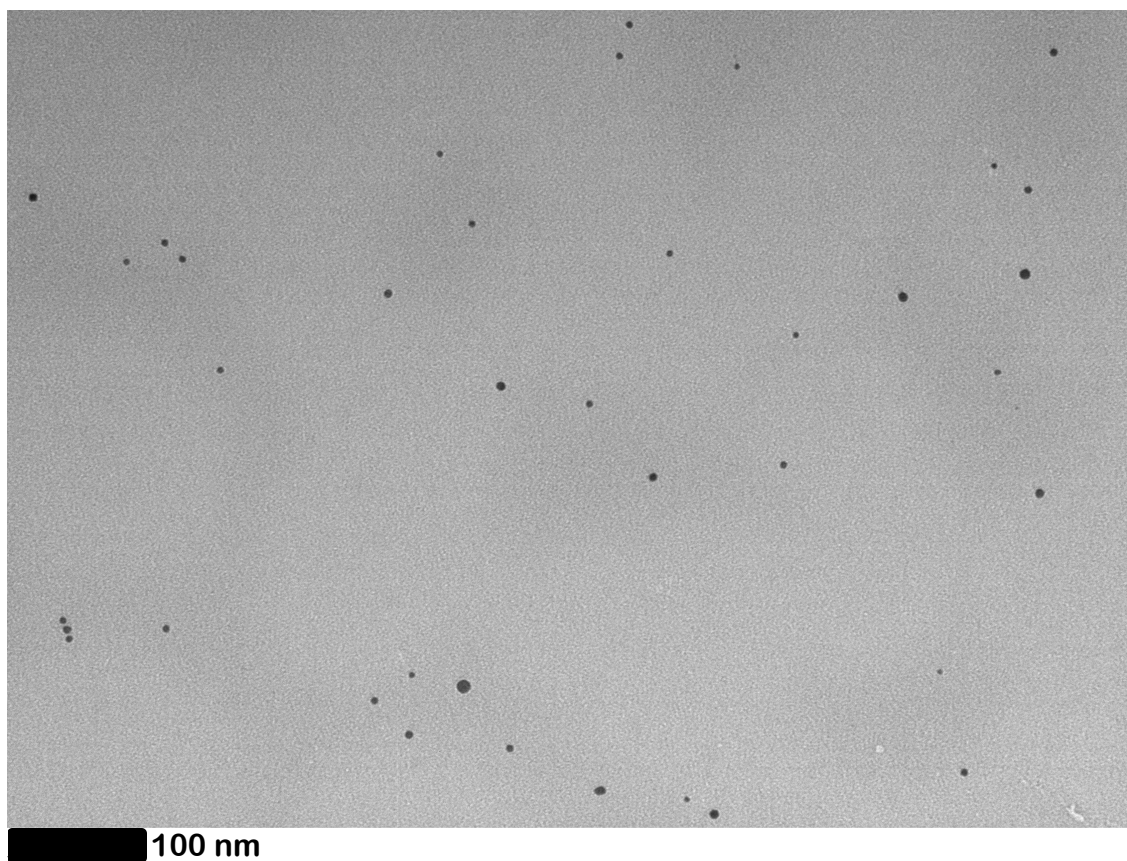

**Fig. S1** Representative TEM images of laser-induced gold nanoparticles after 26 min of irradiation at  $I \sim 2.4 \times 10^{11} \text{ W.cm}^{-2}$  of 0.1 M PVA, 1 mM gold chloride ( $\text{HAuCl}_4$ ) solutions

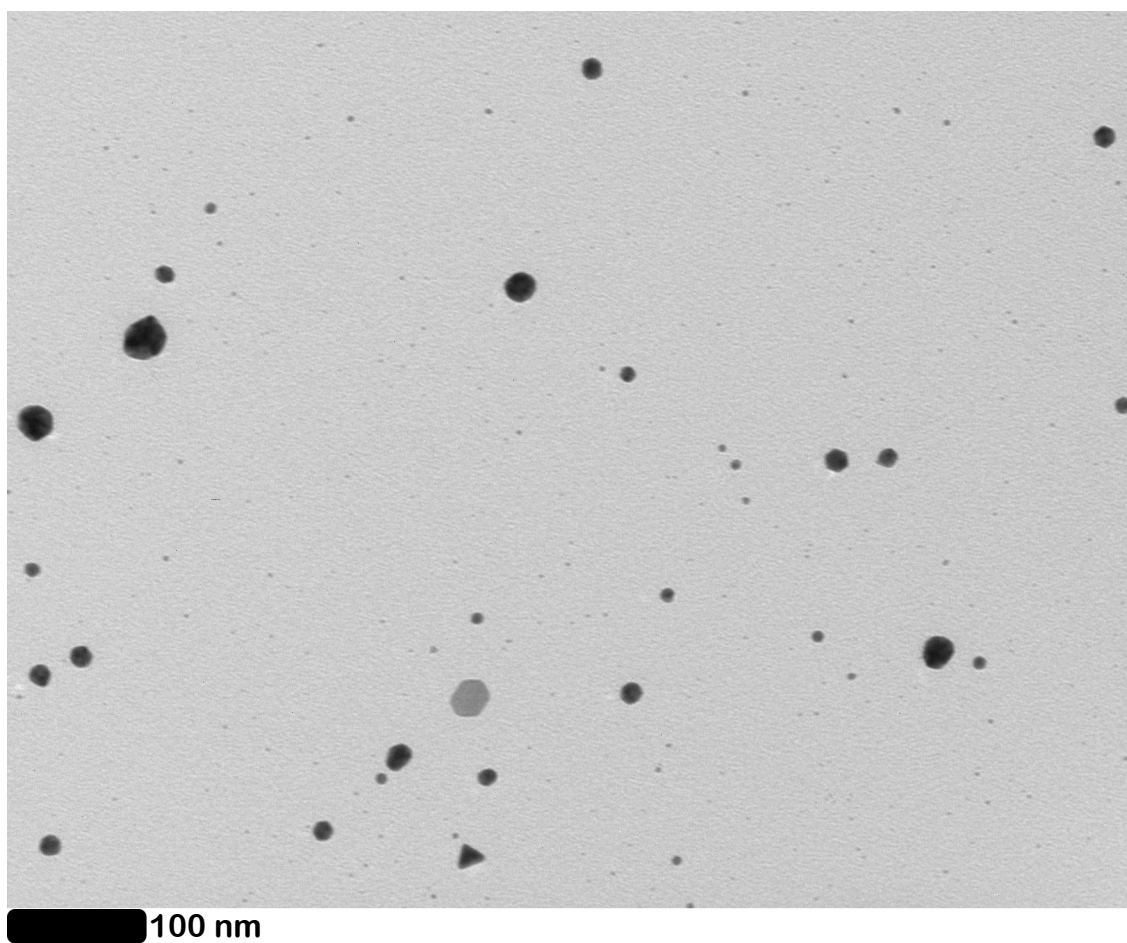

**Fig. S2** Representative TEM images of radiation-induced gold nanoparticles after 180 min of irradiation at  $I \sim 10 \text{ Gy} \cdot \text{min}^{-1}$  of 0.1 M PVA, 1 mM gold chloride ( $\text{HAuCl}_4$ ) solutions

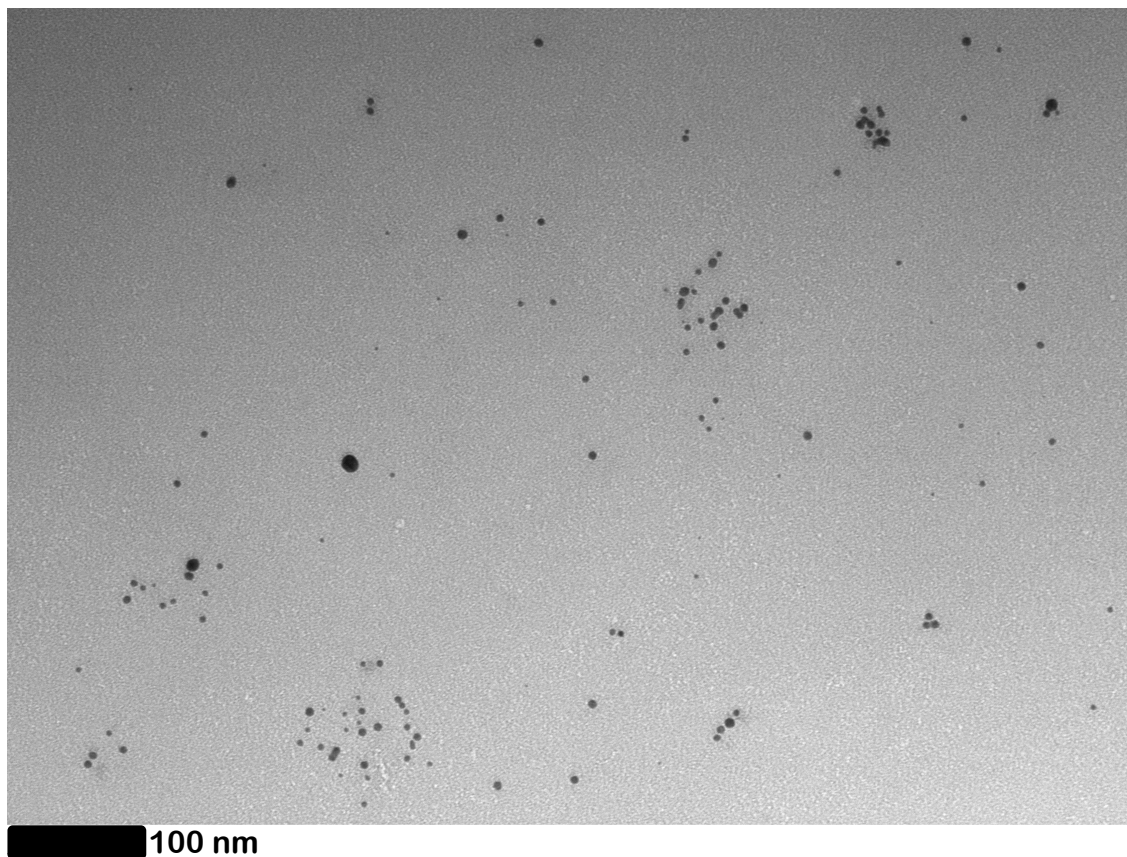

**Fig. S3** Representative TEM images of laser-induced gold nanoparticles after 59 min of irradiation at  $I \sim 1.9 \times 10^{11} \text{ W.cm}^{-2}$  of 0.1 M PVA, 1 mM gold chloride ( $\text{HAuCl}_4$ ) solutions

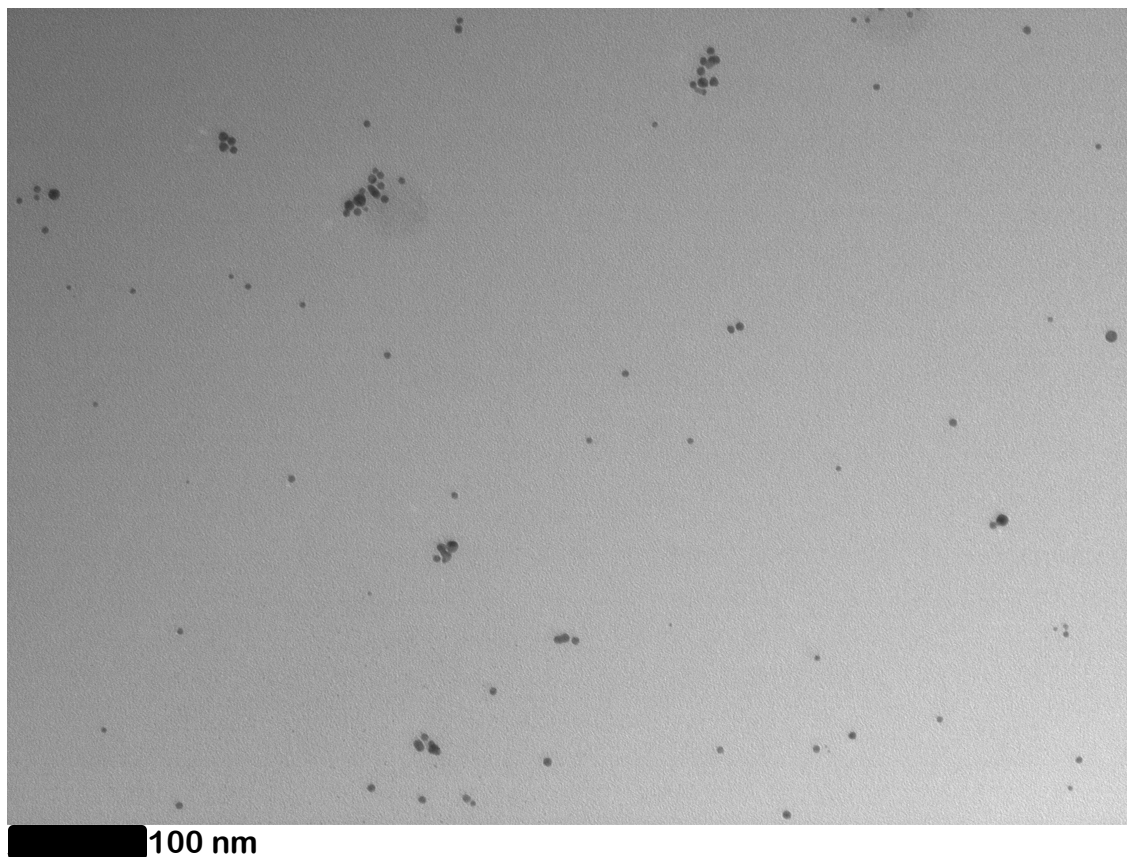

**Fig. S4** Representative TEM images of laser-induced gold nanoparticles after 142 min of irradiation at  $I \sim 1.6 \times 10^{11} \text{ W.cm}^{-2}$  of 0.1 M PVA, 1 mM gold chloride ( $\text{HAuCl}_4$ ) solutions
